# Supplementary material for: The effect of triple CFTR modulator therapy and azithromycin on ion channels and inflammation in cystic fibrosis
Source: PubMed Central journal article supplement (PMC11647873; doi:10.1183/23120541.00502-2024), 2024-12-16
Supplement: 00502-2024.SUPPLEMENT.pdf [file 00502-2024.SUPPLEMENT.pdf]

# **THE EFFECT OF TRIPLE CFTR MODULATOR THERAPY AND AZITHROMYCIN ON ION CHANNELS AND INFLAMMATION IN CYSTIC FIBROSIS**

Suhad Bani Melhim<sup>1,2</sup>, Lisa E.J. Douglas<sup>1</sup>, James A. Reihill<sup>1</sup>, Damian G. Downey<sup>3</sup>, S. Lorraine Martin<sup>1\*</sup>.

<sup>1</sup>School of Pharmacy, Queen's University Belfast, Northern Ireland, UK.

<sup>2</sup>Department of Clinical Pharmacy and Pharmacy Practice, Faculty of Pharmaceutical Sciences, The Hashemite University, Zarqa, Jordan.

<sup>3</sup>Wellcome-Wolfson Institute of Experimental Medicine, School of Medicine, Dentistry and Biomedical Science, Queen's University Belfast, Northern Ireland, UK.

## **Supplementary Data**

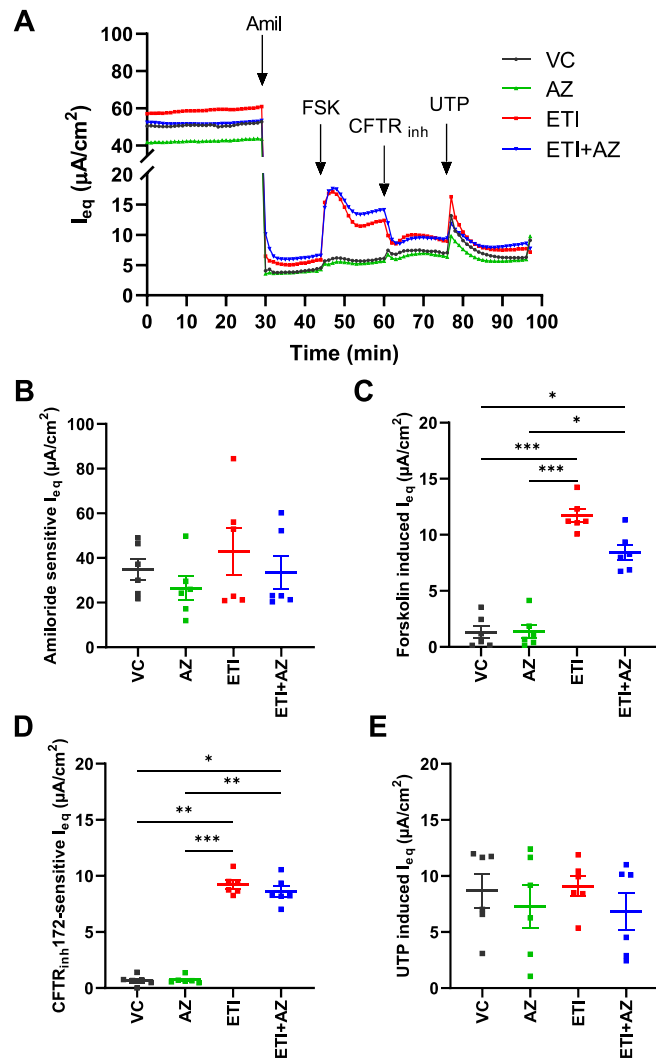

**Figure S1: AZ has no synergistic/antagonist effect on ion channels upon combination with ETI in homozygous (F508del/F508del) CF HBE cells at 96 hours.** (A) Representative traces of  $I_{eq}$  over time. CF HBEs primary cells grown at air liquid interface were pretreated basolaterally for **96 hours** with: vehicle (DMSO 0.08%; v/v) and AZ (10  $\mu\text{g}/\text{mL}$ ). ETI (ELX/TEZ/LUM; 3/18/1  $\mu\text{M}$ ) was added to all assigned wells 24 hours prior to experiment. Changes in  $I_{eq}$  were measured using the MTECC-24 system after the apical addition of amiloride (10  $\mu\text{M}$ ), Forskolin (20  $\mu\text{M}$ ),  $\text{CFTR}_{inh}172$  (20  $\mu\text{M}$ ) and UTP (100 $\mu\text{M}$ ). Quantified (B) Amiloride sensitive  $I_{eq}$ ; (C) Forskolin induced  $I_{eq}$ ; (D)  $\text{CFTR}_{inh}172$  sensitive  $I_{eq}$  and (E) UTP sensitive current responses ( $\mu\text{A}/\text{cm}^2$ ) are shown. Data presented as the mean  $\pm$ SEM. Statistical analyses were performed using a Kruskal-Wallis statistical test with Dunn's multiple comparisons post-hoc test. \* p value  $\leq 0.05$ . N=6 (3 filters each from two donors).

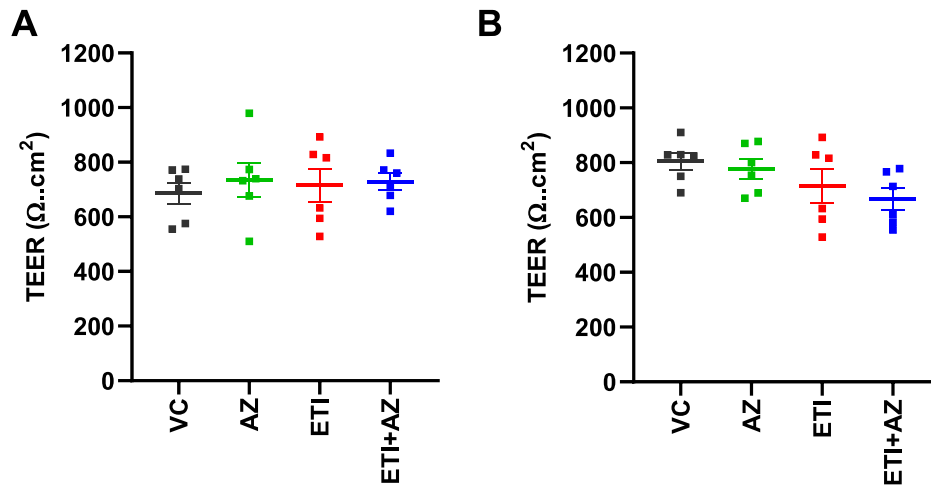

**Figure S2: TEER assessment of homozygous (F508del/F508del) CF HBE cells over the course of the treatment period.** CF HBEs primary cells grown at air liquid interface were pretreated basolaterally for (A) 24 and (B) 96 h with: vehicle (DMSO 0.08%; v/v) and AZ (10  $\mu\text{g}/\text{mL}$ ). ETI (ELX/TEZ/LUM; 3/18/1  $\mu\text{M}$ ) was added to all assigned wells 24 hours prior to measurement. TEER values ( $\Omega\cdot\text{cm}^2$ ) were measured using the MTECC-24 system. Data presented as the mean  $\pm$ SEM. Statistical analyses were performed using a Kruskal-Wallis statistical test. No significant difference was reported. N=6 (3 filters each from two donors).
